# Supplementary material for: Regulation of neutrophil associated RNASET2 expression in rheumatoid arthritis
Source: PubMed Central journal article supplement (PMC11538310; doi:10.1038/s41598-024-77694-y), 2024-11-05
Supplement: 41598_2024_77694_MOESM1_ESM.pdf [file 41598_2024_77694_MOESM1_ESM.pdf]

**A**

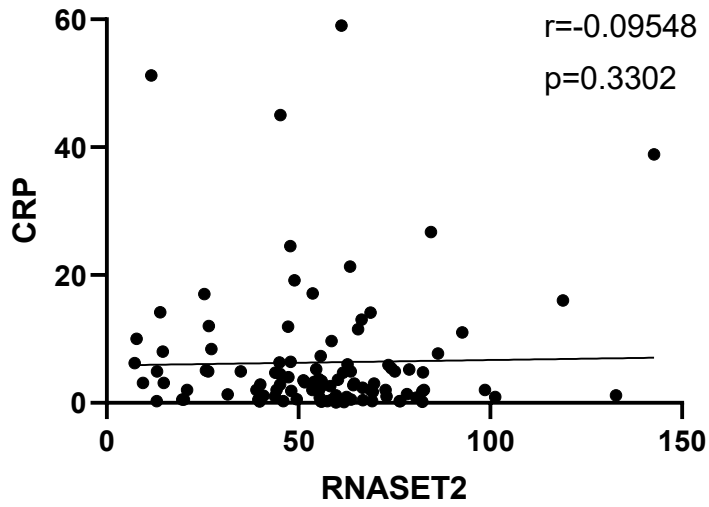

**B**

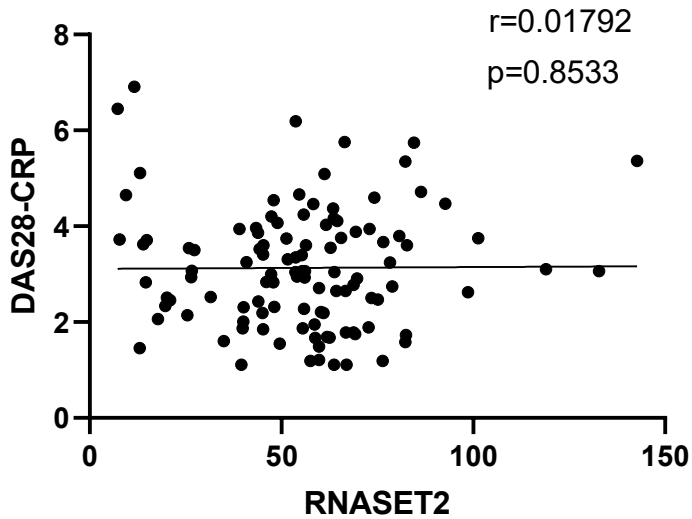

**Supplementary Figure 1 - Correlation of RNASET2 circulating levels with disease activity indexes.** Correlation between RNASET2 serum levels and CRP (A) and DAS28-CRP (B) by Spearman test.
